# Supplementary material
Source: MDPI journal article supplement (https://www.mdpi.com/2073-8994/12/8/1345)
Supplement: s1 [file s1]

## Sheet: Table S1
Table S1. Data collection information and scientific names of bamboos.
Dataset Code	Genus	Latin Name	Locality	Geographical coordinates	Sampling date
1	Bambusa	Bambusa emeiensis L.C. Chia et H.L. Fung	Tongzi, Zunyi, Guizhou Province	106° 57′52″E, 28° 43′20″N	2018.6.17
2	Bambusa	Bambusa emeiensis “Viridiflavus”	Nanjing Forestry University Campus	118° 48′51″E, 32° 4′59″N	2018.5.23
3	Bambusa	Bambusa multiplex (Loureiro) Raeuschel ex Schultes & J.H. Schultes	Nanjing Forestry University Campus	118° 48′51″E, 32° 4′59″N	2018.5.24
4	Bambusa	Bambusa multiplex ‘Alphonse-Karr’	Nanjing Forestry University Campus	118° 48′51″E, 32° 4′59″N	2018.5.27
5	Bambusa	Bambusa subaequalis H.L. Fung et C.Y. Sia	Southwest Forestry University Campus, Kunming, Yunnan Province	102° 45′26″E, 25° 3′44″N	2018.7.30
6	Bambusa	Bambusa ventricosa McClure	Nanjing Forestry University Campus	118° 48′51″E, 32° 4′59″N	2018.5.21
7	Bashania	Bashania fargesii (E.G. Camus) Keng f. et Yi	Baima Resource Nursery of Nanjing Forestry University	119° 07′42″E, 31° 37′55″N	2018.6.4
8	Chimonobambusa	Chimonobambusa angustifolia C.D. Chu et C.S. Chao	Baima Resource Nursery of Nanjing Forestry University	119° 07′42″E, 31° 37′55″N	2018.6.4
9	Chimonobambusa	Chimonobambusa communis (Hsueh & T.P. Yi) T.H. Wen et Ohrnberger	Baima Resource Nursery of Nanjing Forestry University	119° 07′42″E, 31° 37′55″N	2018.6.4
10	Chimonobambusa	Chimonobambusa marmorea (Mitford) Makino	Nanjing Forestry University Campus	118° 48′51″E, 32° 4′59″N	2018.5.22
11	Chimonobambusa	Chimonobambusa marmorea f. variegata Ohwi	Nanjing Forestry University Campus	118° 48′51″E, 32° 4′59″N	2018.5.28
12	Chimonobambusa	Chimonobambusa purpurea Hsueh & T.P.Yi	Nanjing Forestry University Campus	118° 48′51″E, 32° 4′59″N	2018.5.22
13	Chimonobambusa	Chimonobambusa quadrangularis (Franceschi) Makino	Nanjing Forestry University Campus	118° 48′51″E, 32° 4′59″N	2018.5.22
14	Chimonobambusa	Chimonobambusa setiformis Wen	Baima Resource Nursery of Nanjing Forestry University	119° 07′42″E, 31° 37′55″N	2018.6.4
15	Chimonobambusa	Chimonobambusa sichuanensis (T.P. Yi) T.H. Wen	Nanjing Forestry University Campus	118° 48′51″E, 32° 4′59″N	2018.5.22
16	Chimonobambusa	Chimonobambusa tumidissinoda Hsueh & T.P. Yi ex Ohrnberger	Nanjing Forestry University Campus	118° 48′51″E, 32° 4′59″N	2018.5.22
17	Chimonobambusa	Chimonobambusa utilis (Keng) P.C. Keng	Tongzi, Zunyi, Guizhou Province	106° 44′25″E, 28° 17′39″N	2018.6.12
18	Dendrocalamus	Dendrocalamus brandisii (Munro) Kurz	Southwest Forestry University Campus, Kunming, Yunnan Province	102° 45′26″E, 25° 3′44″N	2018.7.30
19	Dendrocalamus	Dendrocalamus latiflorus Munro	Tongzi, Zunyi, Guizhou Province	106° 57′52″E, 28° 43′20″N	2018.6.17
20	Dendrocalamus	Dendrocalamus sinicus Chia et J.L. Sun	Southwest Forestry University Campus, Kunming, Yunnan Province	102° 45′26″E, 25° 3′44″N	2018.7.30
21	Drepanostachyum	Drepanostachyum luodianense (Yi et R.S. Wang) Keng f.	Baima Resource Nursery of Nanjing Forestry University	119° 07′42″E, 31° 37′55″N	2018.6.4
22	Drepanostachyum	Drepanostachyum microphyllum (Hsueh et Yi) Keng f. ex Yi	Tongzi, Zunyi, Guizhou Province	106° 57′52″E, 28° 43′20″N	2018.6.17
23	Drepanostachyum	Drepanostachyum scandens (Hsueh et W.D. Li) Keng f. ex Yi	Baima Resource Nursery of Nanjing Forestry University	119° 07′42″E, 31° 37′55″N	2018.6.4
24	Fargesia	Fargesia alatovaginata Yi et J.Y. Shi	Tongzi, Zunyi, Guizhou Province	106° 50′36″E, 28° 15′26″N	2018.6.16
25	Fargesia	Fargesia denudata T.P. Yi	Baima Resource Nursery of Nanjing Forestry University	119° 07′42″E, 31° 37′55″N	2018.6.4
26	Fargesia	Fargesia yunnanensis Hsueh & T.P. Yi	Southwest Forestry University Campus, Kunming, Yunnan Province	102° 45′26″E, 25° 3′44″N	2018.7.30
27	Hibanobambusa	Hibanobambusa tranquillans f. shiroshima H. Okamura	Nanjing Forestry University Campus	118° 48′51″E, 32° 4′59″N	2018.5.27
28	Indocalamus	Indocalamus chishuiensis Y.L. Yang et Hsueh	Tongzi, Zunyi, Guizhou Province	106° 58′50″E, 28° 13′12″N	2018.6.19
29	Indocalamus	Indocalamus hirtivaginatus H.R. Zhao & Y.L. Yang	Nanjing Forestry University Campus	118° 48′51″E, 32° 4′59″N	2018.5.24
30	Indocalamus	Indocalamus tessellatus (Munro) Keng f.	Tongzi, Zunyi, Guizhou Province	106° 58′39″E, 28° 13′51″N	2018.6.19
31	Indosasa	Indosasa gigantea (T.H. Wen) T.H. Wen	Nanjing Forestry University Campus	118° 48′51″E, 32° 4′59″N	2018.6.2
32	Indosasa	Indosasa shibataeoides McClure	Nanjing Forestry University Campus	118° 48′51″E, 32° 4′59″N	2018.5.21
33	Indosasa	Indosasa sinica C.D. Chu & C.S. Chao	Nanjing Forestry University Campus	118° 48′51″E, 32° 4′59″N	2018.5.30
34	Oligostachyum	Oligostachyum lubricum (Wen) Keng f.	Baima Resource Nursery of Nanjing Forestry University	119° 07′42″E, 31° 37′55″N	2018.6.4
35	Oligostachyum	Oligostachyum oedogonatum (Z.P. Wang et G.H. Ye) Q.F. Zheng et K.F. Huang	Baima Resource Nursery of Nanjing Forestry University	119° 07′42″E, 31° 37′55″N	2018.6.4
36	Oligostachyum	Oligostachyum sulcatum Z.P. Wang et G.H. Ye	Nanjing Forestry University Campus	118° 48′51″E, 32° 4′59″N	2018.5.30
37	Phyllostachys	Phyllostachys arcana f. luteosulcata C.D. Chu et C.S. Chao	Nanjing Forestry University Campus	118° 48′51″E, 32° 4′59″N	2018.5.23
38	Phyllostachys	Phyllostachys aurea Carrière ex Rivière & C. Rivière	Nanjing Forestry University Campus	118° 48′51″E, 32° 4′59″N	2018.5.22
39	Phyllostachys	Phyllostachys aurea f. flavescens-inversa (H. de Lehaie) Muroi	Baima Resource Nursery of Nanjing Forestry University	119° 07′42″E, 31° 37′55″N	2018.6.4
40	Phyllostachys	Phyllostachys aurea f. koi G.H. Lai	Baima Resource Nursery of Nanjing Forestry University	119° 07′42″E, 31° 37′55″N	2018.6.4
41	Phyllostachys	Phyllostachys aureosulcata McClure	Nanjing Forestry University Campus	118° 48′51″E, 32° 4′59″N	2018.5.27
42	Phyllostachys	Phyllostachys aureosulcata f. aureocaulis McClure	Baima Resource Nursery of Nanjing Forestry University	119° 07′42″E, 31° 37′55″N	2018.6.4
43	Phyllostachys	Phyllostachys aureosulcata f. spectabilis C.D. Chu et C.S. Cha	Nanjing Forestry University Campus	118° 48′51″E, 32° 4′59″N	2018.5.25
44	Phyllostachys	Phyllostachys bambusoides Sieb et Zucc.	Nanjing Forestry University Campus	118° 48′51″E, 32° 4′59″N	2018.5.21
45	Phyllostachys	Phyllostachys bambusoides f. castillonis (Mitford) Muroi	Nanjing Forestry University Campus	118° 48′51″E, 32° 4′59″N	2018.5.30
46	Phyllostachys	Phyllostachys bambusoides f. lacrimadeae Keng f. et Wen	Nanjing Forestry University Campus	118° 48′51″E, 32° 4′59″N	2018.5.27
47	Phyllostachys	Phyllostachys bambusoides f. marliacea (Makino ex I. Tsuboi) Muroi	Baima Resource Nursery of Nanjing Forestry University	119° 07′42″E, 31° 37′55″N	2018.6.4
48	Phyllostachys	Phyllostachys bambusoides f. mixta Z.P. Wang et N.X. Ma	Baima Resource Nursery of Nanjing Forestry University	119° 07′42″E, 31° 37′55″N	2018.6.4
49	Phyllostachys	Phyllostachys bissetii McClure	Nanjing Forestry University Campus	118° 48′51″E, 32° 4′59″N	2018.5.25
50	Phyllostachys	Phyllostachys dulcis McClure	Baima Resource Nursery of Nanjing Forestry University	119° 07′42″E, 31° 37′55″N	2018.6.4
51	Phyllostachys	Phyllostachys edulis (Carrière) H. de Lehaie	Nanjing Forestry University Campus	118° 48′51″E, 32° 4′59″N	2018.5.27
52	Phyllostachys	Phyllostachys edulis f. gracilis (Hsiung) Chao et Renv.	Nanjing Forestry University Campus	118° 48′51″E, 32° 4′59″N	2018.5.28
53	Phyllostachys	Phyllostachys edulis f. huamaozhu (Wen) Chao et Renv.	Baima Resource Nursery of Nanjing Forestry University	119° 07′42″E, 31° 37′55″N	2018.6.4
54	Phyllostachys	Phyllostachys edulis ‘Kikko-chiku’ G.H. Lai	Nanjing Forestry University Campus	118° 48′51″E, 32° 4′59″N	2018.6.2
55	Phyllostachys	Phyllostachys glabrata S.Y. Chen et C.Y. Yao	Baima Resource Nursery of Nanjing Forestry University	119° 07′42″E, 31° 37′55″N	2018.6.4
56	Phyllostachys	Phyllostachys glauca McClure	Nanjing Forestry University Campus	118° 48′51″E, 32° 4′59″N	2018.5.28
57	Phyllostachys	Phyllostachys heteroclada Oliver	Baima Resource Nursery of Nanjing Forestry University	119° 07′42″E, 31° 37′55″N	2018.6.4
58	Phyllostachys	Phyllostachys heteroclada f. decurtata (S.L. Chen) Wen	Baima Resource Nursery of Nanjing Forestry University	119° 07′42″E, 31° 37′55″N	2018.6.4
59	Phyllostachys	Phyllostachys hispida S.C. Li	Baima Resource Nursery of Nanjing Forestry University	119° 07′42″E, 31° 37′55″N	2018.6.4
60	Phyllostachys	Phyllostachys makinoi Hayata	Baima Resource Nursery of Nanjing Forestry University	119° 07′42″E, 31° 37′55″N	2018.6.4
61	Phyllostachys	Phyllostachys meyeri McClure	Baima Resource Nursery of Nanjing Forestry University	119° 07′42″E, 31° 37′55″N	2018.6.4
62	Phyllostachys	Phyllostachys nidularia Munro	Nanjing Forestry University Campus	118° 48′51″E, 32° 4′59″N	2018.5.28
63	Phyllostachys	Phyllostachys nigra (Lodd. ex Lindl.) Munro	Baima Resource Nursery of Nanjing Forestry University	119° 07′42″E, 31° 37′55″N	2018.6.4
64	Phyllostachys	Phyllostachys nigra var. henonis (Mitford) Stapf ex Rendle	Nanjing Forestry University Campus	118° 48′51″E, 32° 4′59″N	2018.6.2
65	Phyllostachys	Phyllostachys parvifolia C.D. Chu et H.Y. Chou	Baima Resource Nursery of Nanjing Forestry University	119° 07′42″E, 31° 37′55″N	2018.6.4
66	Phyllostachys	Phyllostachys prominens W.Y. Xiong	Baima Resource Nursery of Nanjing Forestry University	119° 07′42″E, 31° 37′55″N	2018.6.4
67	Phyllostachys	Phyllostachys propinqua McClure	Nanjing Forestry University Campus	118° 48′51″E, 32° 4′59″N	2018.5.23
68	Phyllostachys	Phyllostachys rivalis H.R. Zhao et A.T. Liu	Baima Resource Nursery of Nanjing Forestry University	119° 07′42″E, 31° 37′55″N	2018.6.4
69	Phyllostachys	Phyllostachys rutila T.H. Wen	Baima Resource Nursery of Nanjing Forestry University	119° 07′42″E, 31° 37′55″N	2018.6.4
70	Phyllostachys	Phyllostachys shuchengensis S.C.Li & S.H.Wu	Baima Resource Nursery of Nanjing Forestry University	119° 07′42″E, 31° 37′55″N	2018.6.4
71	Phyllostachys	Phyllostachys sulphurea f. robertii Chao et Renv.	Baima Resource Nursery of Nanjing Forestry University	119° 07′42″E, 31° 37′55″N	2018.6.4
72	Phyllostachys	Phyllostachys sulphurea var. viridis R.A. Young	Nanjing Forestry University Campus	118° 48′51″E, 32° 4′59″N	2018.5.24
73	Phyllostachys	Phyllostachys violascens (Carrière) A. et C. Riv.	Nanjing Forestry University Campus	118° 48′51″E, 32° 4′59″N	2018.6.2
74	Phyllostachys	Phyllostachys violascens f. viridisulcata (P.X. Zhang et W.X. Huang) G.H. Lai	Baima Resource Nursery of Nanjing Forestry University	119° 07′42″E, 31° 37′55″N	2018.6.4
75	Phyllostachys	Phyllostachys viridiglaucescens (Carr.) A. et C. Riv.	Baima Resource Nursery of Nanjing Forestry University	119° 07′42″E, 31° 37′55″N	2018.6.4
76	Phyllostachys	Phyllostachys vivax f. aureocaulis N.X. Ma	Nanjing Forestry University Campus	118° 48′51″E, 32° 4′59″N	2018.5.30
77	Phyllostachys	Phyllostachys vivax f. huangwenzhu J.L. Lu.	Baima Resource Nursery of Nanjing Forestry University	119° 07′42″E, 31° 37′55″N	2018.6.4
78	Phyllostachys	Phyllostachys vivax ‘Jintianyu’	Baima Resource Nursery of Nanjing Forestry University	119° 07′42″E, 31° 37′55″N	2018.6.4
79	Pleioblastus	Pleioblastus amarus (Keng) Keng f.	Baima Resource Nursery of Nanjing Forestry University	119° 07′42″E, 31° 37′55″N	2018.6.4
80	Pleioblastus	Pleioblastus argenteostriatus (Regel) Nakai	Nanjing Forestry University Campus	118° 48′51″E, 32° 4′59″N	2018.5.21
81	Pleioblastus	Pleioblastus chino (Franchet et Savatier) Makino	Nanjing Forestry University Campus	118° 48′51″E, 32° 4′59″N	2018.5.21
82	Pleioblastus	Pleioblastus fortunei (Van Houtte) Nakai	Nanjing Forestry University Campus	118° 48′51″E, 32° 4′59″N	2018.5.25
83	Pleioblastus	Pleioblastus gozadakensis Nakai	Baima Resource Nursery of Nanjing Forestry University	119° 07′42″E, 31° 37′55″N	2018.6.4
84	Pleioblastus	Pleioblastus gramineus (Bean) Nakai	Baima Resource Nursery of Nanjing Forestry University	119° 07′42″E, 31° 37′55″N	2018.6.4
85	Pleioblastus	Pleioblastus maculatus (McClure) C.D. Chu & C.S. Chao	Nanjing Forestry University Campus	118° 48′51″E, 32° 4′59″N	2018.5.21
86	Pleioblastus	Pleioblastus oleosus T.H. Wen	Nanjing Forestry University Campus	118° 48′51″E, 32° 4′59″N	2018.6.2
87	Pleioblastus	Pleioblastus pygmaeus (Miq.) Nakai	Nanjing Forestry University Campus	118° 48′51″E, 32° 4′59″N	2018.5.24
88	Pleioblastus	Pleioblastus solidus S.Y. Chen	Baima Resource Nursery of Nanjing Forestry University	119° 07′42″E, 31° 37′55″N	2018.6.4
89	Pleioblastus	Pleioblastus sp.	Baima Resource Nursery of Nanjing Forestry University	119° 07′42″E, 31° 37′55″N	2018.6.4
90	Pleioblastus	Pleioblastus viridistriatus Makino	Nanjing Forestry University Campus	118° 48′51″E, 32° 4′59″N	2018.5.21
91	Pseudosasa	Pseudosasa amabilis var. convexa Z.P. Wang & G.H. Ye	Nanjing Forestry University Campus	118° 48′51″E, 32° 4′59″N	2018.5.23
92	Pseudosasa	Pseudosasa japonica (Siebold & Zuccarini ex Steudel) Makino ex Nakai	Nanjing Forestry University Campus	118° 48′51″E, 32° 4′59″N	2018.5.25
93	Pseudosasa	Pseudosasa japonica var. tsutsumiana Yanagita	Baima Resource Nursery of Nanjing Forestry University	119° 07′42″E, 31° 37′55″N	2018.6.4
94	Sasaella	Sasaella glabra f. albostriata Muroi	Nanjing Forestry University Campus	118° 48′51″E, 32° 4′59″N	2018.5.30
95	Sasaella	Sasaella kogasensis ‘Aureostriatus’	Nanjing Forestry University Campus	118° 48′51″E, 32° 4′59″N	2018.5.24
96	Semiarundinaria	Semiarundinaria densiflora (Rendle) T.H.Wen	Nanjing Forestry University Campus	118° 48′51″E, 32° 4′59″N	2018.5.23
97	Semiarundinaria	Semiarundinaria fastuosa (Mitford) Makino	Baima Resource Nursery of Nanjing Forestry University	119° 07′42″E, 31° 37′55″N	2018.6.4
98	Semiarundinaria	Semiarundinaria sinica T.H. Wen	Nanjing Forestry University Campus	118° 48′51″E, 32° 4′59″N	2018.5.27
99	Sinobambusa	Sinobambusa tootsik (Sieb.) Makino	Nanjing Forestry University Campus	118° 48′51″E, 32° 4′59″N	2018.5.28
100	Sinobambusa	Sinobambusa tootsik var. luteoloalbostriata S.H. Chen ex Z.Z. Wang	Baima Resource Nursery of Nanjing Forestry University	119° 07′42″E, 31° 37′55″N	2018.6.4
101	Yushania	Yushania niitakayamensis (Hayata) Keng f.	Tongzi, Zunyi, Guizhou Province	106° 58′50″E, 28° 13′12″N	2018.6.16

## Sheet: Table S2
Table S2. Comparison of the ratios of the leaf dry mass to fresh mass among the 101 bamboo taxa.
Dataset Code	Mean	SD	Min	Max	n	Significance
1	0.390601	0.0155469	0.345821	0.42805	99	GHIJKL
2	0.379954	0.0321178	0.276762	0.450519	90	KLMNOP
3	0.394755	0.0230829	0.303709	0.431373	100	EFGHIJK
4	0.396756	0.0217846	0.337719	0.467467	97	CDEFGHIJK
5	0.450811	0.0227925	0.400515	0.536053	93	cdef
6	0.44943	0.0228411	0.390746	0.521889	97	cdefg
7	0.431613	0.0314096	0.350806	0.534891	98	hijklmnopqrs
8	0.412911	0.0125289	0.386023	0.44645	100	uvwxyzABC
9	0.425019	0.0394606	0.344697	0.554082	95	lmnopqrstuv
10	0.38439	0.0245669	0.239006	0.447284	99	IJKLMN
11	0.363309	0.0156229	0.30566	0.398551	100	PQRST
12	0.362729	0.0147777	0.328384	0.410667	98	QRST
13	0.364236	0.0225327	0.293654	0.410989	97	PQRST
14	0.356828	0.0279843	0.269841	0.42765	98	RSTU
15	0.415529	0.0285637	0.334713	0.519774	100	stuvwxyzA
16	0.366553	0.0280877	0.292208	0.469697	97	OPQRS
17	0.432144	0.0273252	0.33425	0.481528	104	hijklmnopqr
18	0.401285	0.0457201	0.250419	0.494831	98	zABCDEFGH
19	0.387677	0.0164228	0.34596	0.443697	91	GHIJKLMN
20	0.411348	0.027526	0.255131	0.48371	101	vwxyzABCD
21	0.381205	0.0199811	0.333333	0.435115	106	KLMNO
22	0.456857	0.0402744	0.314103	0.626794	99	cd
23	0.360297	0.0253312	0.297386	0.449349	103	RST
24	0.432747	0.0199473	0.375648	0.472749	101	hijklmnopqr
25	0.437546	0.0513391	0.324324	0.656716	101	fghijklmnop
26	0.447748	0.0314297	0.38629	0.539037	99	cdefgh
27	0.418245	0.0253101	0.344968	0.539698	100	qrstuvwxy
28	0.431001	0.0430177	0.295323	0.539231	96	ijklmnopqrs
29	0.424342	0.0253674	0.36112	0.46988	100	nopqrstuvw
30	0.443917	0.0371127	0.356243	0.635181	95	defghijk
31	0.438563	0.0262916	0.386408	0.530248	102	efghijklmno
32	0.376561	0.0318439	0.305236	0.49963	98	LMNOPQ
33	0.444842	0.0248891	0.37931	0.501699	100	defghi
34	0.429363	0.0230088	0.388727	0.500502	100	ijklmnopqrst
35	0.396743	0.0191139	0.344439	0.445669	100	CDEFGHIJK
36	0.40052	0.0408738	0.328994	0.50439	96	ABCDEFGHI
37	0.361732	0.0270871	0.266583	0.42607	107	QRST
38	0.408418	0.0219616	0.345538	0.464286	99	wxyzABCDEF
39	0.463472	0.015074	0.401525	0.497531	100	bc
40	0.454515	0.0159396	0.409877	0.493783	94	cde
41	0.418409	0.0600688	0.205128	0.610691	102	qrstuvwxy
42	0.427869	0.0201211	0.34188	0.472393	103	jklmnopqrstu
43	0.420986	0.0293011	0.344876	0.483454	100	qrstuvwx
44	0.440688	0.0222325	0.391707	0.527485	100	defghijklm
45	0.454074	0.0268371	0.35282	0.538682	99	cde
46	0.444893	0.0163826	0.400258	0.479784	98	defghi
47	0.490543	0.0301417	0.382524	0.611062	106	a
48	0.417563	0.0243486	0.340731	0.4891	100	rstuvwxyz
49	0.410647	0.0282925	0.343634	0.479267	101	vwxyzABCDE
50	0.364935	0.00982549	0.33982	0.386034	105	PQRST
51	0.383442	0.0309712	0.317358	0.490323	101	JKLMN
52	0.377105	0.0294938	0.320528	0.439521	98	LMNOPQ
53	0.424865	0.019046	0.374459	0.460714	110	mnopqrstuv
54	0.434071	0.0232908	0.336898	0.517647	101	ghijklmnopq
55	0.419833	0.0253075	0.340198	0.477167	104	qrstuvwx
56	0.426209	0.0177767	0.350481	0.45874	98	lmnopqrstuv
57	0.430445	0.0192823	0.352022	0.460299	97	ijklmnopqrs
58	0.422024	0.0293816	0.362177	0.621757	96	pqrstuvwx
59	0.440997	0.0156273	0.386025	0.480198	100	defghijkl
60	0.443899	0.0180164	0.394973	0.48399	104	defghijk
61	0.444038	0.0226618	0.355455	0.505747	98	defghij
62	0.400284	0.0161477	0.363292	0.48818	97	ABCDEFGHI
63	0.354255	0.0240681	0.292818	0.403462	104	STU
64	0.450225	0.0319818	0.376531	0.550789	100	cdefg
65	0.40244	0.0187747	0.328836	0.439024	106	yzABCDEFG
66	0.449225	0.0371691	0.342841	0.615441	101	cdefg
67	0.423831	0.0257313	0.362023	0.502234	99	opqrstuvwx
68	0.395194	0.0251882	0.333092	0.50522	102	DEFGHIJK
69	0.395942	0.0236818	0.350304	0.527473	100	DEFGHIJK
70	0.444426	0.0238018	0.317928	0.478788	98	defghi
71	0.398498	0.0322785	0.269103	0.479368	103	BCDEFGHIJ
72	0.412452	0.0147668	0.375921	0.440909	95	uvwxyzABC
73	0.410853	0.0201305	0.317332	0.488815	92	vwxyzABCDE
74	0.408201	0.0164155	0.299145	0.454328	104	xyzABCDEF
75	0.413621	0.0246253	0.356818	0.523647	111	tuvwxyzAB
76	0.440459	0.0142045	0.397385	0.474972	98	defghijklmn
77	0.430986	0.0194292	0.376705	0.500416	103	ijklmnopqrs
78	0.430946	0.0134536	0.391686	0.454336	95	ijklmnopqrs
79	0.394964	0.0223444	0.326157	0.451187	99	EFGHIJK
80	0.349236	0.0230603	0.279512	0.455247	98	TU
81	0.385792	0.0156159	0.338632	0.427222	102	HIJKLMN
82	0.392499	0.0258639	0.297697	0.456198	97	FGHIJKL
83	0.389451	0.0321994	0.321223	0.575938	96	GHIJKLM
84	0.408071	0.0115003	0.376447	0.438903	99	xyzABCDEF
85	0.424795	0.0217937	0.32206	0.465322	99	mnopqrstuv
86	0.395935	0.0396328	0.282915	0.578125	93	DEFGHIJK
87	0.427656	0.0204504	0.378893	0.480392	102	klmnopqrstu
88	0.429588	0.037028	0.286962	0.512974	92	ijklmnopqrst
89	0.418595	0.0241316	0.351904	0.461404	106	qrstuvwx
90	0.341251	0.0171622	0.299318	0.380668	104	U
91	0.372622	0.0161714	0.321624	0.425753	96	NOPQR
92	0.475208	0.0452712	0.352019	0.549569	95	ab
93	0.422561	0.0235306	0.343502	0.483333	98	opqrstuvwx
94	0.383754	0.0224506	0.31198	0.436694	100	JKLMN
95	0.397692	0.0240282	0.342692	0.44326	101	CDEFGHIJ
96	0.386655	0.0386887	0.317677	0.509894	99	GHIJKLMN
97	0.372873	0.0191495	0.278083	0.429675	97	MNOPQR
98	0.430026	0.0372465	0.307121	0.630685	102	ijklmnopqrs
99	0.38422	0.0222479	0.320994	0.470836	98	IJKLMN
100	0.349135	0.0266987	0.2918	0.43729	100	TU
101	0.45479	0.0221449	0.332855	0.495879	95	cde
Max represents the maximum ratio of leaf dry mass to fresh mass across sampled leaves within species;
Mean represents the average ratio of leaf dry mass to fresh mass across sampled leaves within species;
Min represents the minimum ratio of leaf dry mass to fresh mass across sampled leaves within species;
SD represents the standard deviation of the ratio of leaf dry mass to fresh mass across sampled leaves within species;
Significance: the letters show the significance of difference between any two species

## Sheet: Table S3
Table S3. Fitted results for the scaling relationships between the leaf dry mass and leaf fresh mass of the 101 bamboo taxa.
Dataset Code	a	b	sd.a	sd.b	lci.a	uci.a	lci.b	uci.b	RSS	r2	n
1	-0.892658	1.02228	0.0282116	0.0129463	-0.946084	-0.836138	0.99757	1.0479	0.153889	0.985074	99
2	-0.92933	1.01751	0.0380677	0.0158998	-1.0041	-0.853453	0.987748	1.05001	0.72404	0.965451	90
3	-0.925658	1.00255	0.0240032	0.0105262	-0.969164	-0.876189	0.983845	1.02519	0.364737	0.98051	100
4	-0.90049	1.01092	0.0328886	0.0141115	-0.965061	-0.835616	0.98269	1.03843	0.284158	0.983878	97
5	-0.929459	0.938007	0.023999	0.0112915	-0.978758	-0.885465	0.915397	0.958756	0.175628	0.983128	93
6	-0.820511	0.990694	0.0326981	0.0159686	-0.88297	-0.754195	0.959774	1.02299	0.245274	0.978715	97
7	-0.782568	1.05556	0.0251958	0.0237036	-0.832933	-0.733727	1.00981	1.10087	0.515824	0.961782	98
8	-0.832867	1.01923	0.0166034	0.00637798	-0.865961	-0.801571	1.00689	1.03096	0.0855019	0.995519	100
9	-1.10289	0.902254	0.0455108	0.0181194	-1.18688	-1.01174	0.869239	0.93939	0.556226	0.958212	95
10	-0.790734	1.06426	0.0669136	0.0276211	-0.89433	-0.639726	1.02163	1.12706	0.467122	0.965545	99
11	-0.916567	1.03775	0.0256106	0.00971532	-0.967558	-0.866741	1.01871	1.05681	0.181766	0.984008	100
12	-0.968092	1.03408	0.0138693	0.00976796	-0.993619	-0.938891	1.01649	1.05472	0.143541	0.991668	98
13	-1.09759	0.943993	0.018263	0.0115738	-1.13447	-1.06286	0.920328	0.965473	0.295817	0.983598	97
14	-1.09936	0.962133	0.0243912	0.0137046	-1.14342	-1.04783	0.93844	0.992382	0.545243	0.9733	98
15	-0.903948	0.979477	0.0161182	0.0127784	-0.938654	-0.875124	0.951276	1.00101	0.435833	0.976919	100
16	-0.8872	1.04575	0.0548196	0.0222202	-0.993237	-0.779866	1.00232	1.08917	0.573589	0.946068	97
17	-0.873011	0.969368	0.0189015	0.0167197	-0.911407	-0.836434	0.934469	0.999841	0.424265	0.970673	104
18	-0.912464	1.0231	0.0155961	0.0254457	-0.942987	-0.882593	0.974159	1.0709	1.34261	0.922576	98
19	-0.953383	1.04082	0.00457474	0.0114207	-0.961838	-0.94396	1.0171	1.06127	0.144548	0.988967	91
20	-0.892126	1.03339	0.00765515	0.0258742	-0.907885	-0.878264	0.991344	1.08865	0.522866	0.970701	101
21	-1.09233	0.96792	0.0617816	0.0158967	-1.21282	-0.968605	0.93706	0.99958	0.270058	0.97195	106
22	-0.727851	1.0169	0.146562	0.0426884	-0.997732	-0.431039	0.939243	1.10304	0.763441	0.915063	99
23	-0.95385	1.03054	0.0274016	0.0122287	-1.00312	-0.89518	1.00852	1.05591	0.483809	0.984166	103
24	-0.922934	0.963275	0.0443475	0.0191516	-1.00228	-0.831843	0.929367	1.00271	0.20856	0.94388	101
25	-0.621848	1.05778	0.165832	0.0470402	-0.936399	-0.282734	0.967756	1.15452	1.37224	0.852161	101
26	-0.829688	0.987986	0.0515517	0.0275174	-0.930939	-0.729019	0.934188	1.04164	0.463739	0.932068	99
27	-0.790258	1.07932	0.0223193	0.0183287	-0.830337	-0.7437	1.04614	1.11794	0.319211	0.960872	100
28	-0.782626	1.09662	0.0155386	0.0218251	-0.813344	-0.751906	1.05402	1.13966	0.925865	0.957965	96
29	-0.852879	1.02872	0.00576603	0.01233	-0.864119	-0.841745	1.00615	1.05412	0.353565	0.988137	100
30	-0.815759	0.997836	0.00866548	0.0155788	-0.83161	-0.798101	0.966643	1.0291	0.587006	0.97685	95
31	-0.794939	1.01802	0.0404663	0.0233352	-0.870268	-0.716213	0.973326	1.06355	0.34642	0.966165	102
32	-0.756081	1.14126	0.076471	0.0482521	-0.90146	-0.603916	1.05095	1.23795	0.605318	0.899811	98
33	-0.79621	1.01181	0.0157671	0.0117043	-0.826626	-0.766199	0.988658	1.03433	0.311828	0.986581	100
34	-0.833294	1.00881	0.0243587	0.0157719	-0.882791	-0.785136	0.974533	1.03787	0.270553	0.972977	100
35	-0.905618	1.01227	0.0216816	0.0120663	-0.950742	-0.866068	0.987179	1.03441	0.233212	0.986524	100
36	-1.01793	0.956198	0.0652509	0.0287299	-1.15004	-0.892257	0.897715	1.01085	0.871186	0.905771	96
37	-0.951874	1.0271	0.0552727	0.0224736	-1.06061	-0.839229	0.982571	1.07227	0.626428	0.937523	107
38	-0.832501	1.01714	0.051773	0.0136422	-0.934181	-0.730198	0.990081	1.04401	0.285819	0.983619	99
39	-0.755028	1.00541	0.0414541	0.015368	-0.832242	-0.672156	0.976856	1.03613	0.109323	0.98867	100
40	-0.748455	1.01426	0.0375741	0.0134952	-0.818885	-0.672102	0.988955	1.04117	0.115475	0.983343	94
41	-0.731359	1.08612	0.0741952	0.0440922	-0.855491	-0.561445	1.01469	1.18667	2.54378	0.823136	102
42	-0.790385	1.02517	0.0510228	0.0223856	-0.882204	-0.685276	0.98495	1.07182	0.235812	0.979574	103
43	-0.870393	0.998695	0.0438149	0.0212973	-0.960533	-0.786611	0.955463	1.0399	0.492849	0.953625	100
44	-0.861089	0.978297	0.0302474	0.0152183	-0.918969	-0.798961	0.949764	1.00914	0.237368	0.97435	100
45	-0.865829	0.963168	0.0367968	0.0181148	-0.94069	-0.798794	0.927151	0.996947	0.32928	0.971831	99
46	-0.86047	0.970289	0.0238875	0.0141075	-0.907129	-0.812876	0.942412	0.998056	0.122809	0.982546	98
47	-0.746912	0.983366	0.0325147	0.0165261	-0.807345	-0.67967	0.953788	1.01913	0.399713	0.961505	106
48	-0.941634	0.961581	0.0194748	0.010849	-0.981163	-0.90462	0.939557	0.982647	0.312619	0.982169	100
49	-0.851886	1.0179	0.026877	0.0120924	-0.903639	-0.798259	0.995035	1.04277	0.462588	0.98341	101
50	-1.00077	1.00483	0.00944741	0.00621825	-1.01933	-0.982048	0.992443	1.01718	0.0766786	0.995668	105
51	-0.951545	1.00356	0.0683817	0.0237579	-1.08421	-0.8133	0.957063	1.05142	0.656469	0.943175	101
52	-1.09629	0.953349	0.0620523	0.0248857	-1.20715	-0.966055	0.909071	1.00561	0.565902	0.909059	98
53	-1.01834	0.948032	0.0443526	0.0143782	-1.10373	-0.929635	0.920738	0.976774	0.191187	0.974031	110
54	-0.715805	1.04098	0.0469907	0.0168775	-0.798901	-0.614203	1.01214	1.07732	0.294769	0.974279	101
55	-0.861324	1.00413	0.029352	0.0142001	-0.918752	-0.804183	0.975712	1.03079	0.379697	0.970977	104
56	-0.88666	0.982944	0.0229099	0.0112514	-0.93211	-0.843325	0.959992	1.00351	0.16848	0.991506	98
57	-0.852231	0.996213	0.0320198	0.0145624	-0.922328	-0.795627	0.964784	1.02284	0.206701	0.971073	97
58	-0.825807	1.01862	0.0444018	0.0195579	-0.906817	-0.733442	0.982434	1.05856	0.389785	0.939087	96
59	-0.809496	1.00441	0.0316344	0.014942	-0.866231	-0.74038	0.978555	1.03687	0.128265	0.986728	100
60	-0.830152	0.991552	0.0303239	0.0146891	-0.892318	-0.775612	0.961464	1.01867	0.171164	0.978662	104
61	-0.83301	0.991393	0.031499	0.0137111	-0.896441	-0.774752	0.96413	1.01788	0.266751	0.972219	98
62	-0.888178	1.01513	0.0384779	0.0215168	-0.961521	-0.813463	0.973243	1.05627	0.150511	0.977737	97
63	-1.09094	0.980991	0.0814961	0.0301355	-1.23981	-0.921303	0.926303	1.04405	0.473593	0.915486	104
64	-0.758461	1.01985	0.0426807	0.0198827	-0.829177	-0.662869	0.987187	1.06467	0.50202	0.950976	100
65	-0.773709	1.05772	0.0446067	0.0190181	-0.855201	-0.683528	1.0232	1.09695	0.219971	0.974767	106
66	-0.781762	1.01303	0.0359085	0.0208674	-0.850741	-0.708525	0.973516	1.05491	0.64754	0.945648	101
67	-0.939061	0.953587	0.0254861	0.0146884	-0.989617	-0.889607	0.924166	0.981559	0.315374	0.967492	99
68	-0.943205	0.994274	0.045125	0.0190953	-1.02474	-0.849993	0.959991	1.03385	0.380219	0.975784	102
69	-0.943917	0.992251	0.0293344	0.0140563	-1.00308	-0.886933	0.964914	1.02021	0.329635	0.975216	100
70	-0.887566	0.957644	0.0227148	0.0114826	-0.937077	-0.847753	0.933452	0.977313	0.284209	0.97893	98
71	-0.795913	1.05313	0.0659468	0.0292165	-0.920575	-0.66405	0.997906	1.11189	0.729423	0.964786	103
72	-0.893349	0.996527	0.0246446	0.0122752	-0.94041	-0.843815	0.973015	1.0207	0.122671	0.987696	95
73	-0.89991	0.992877	0.0213388	0.0146597	-0.941978	-0.858556	0.962989	1.02077	0.22945	0.975161	92
74	-0.839683	1.02224	0.0366614	0.0150908	-0.900849	-0.760041	0.997746	1.05582	0.186683	0.990873	104
75	-0.910436	0.984903	0.0283806	0.0155815	-0.962254	-0.852578	0.956615	1.01627	0.364675	0.974664	111
76	-0.797223	1.0128	0.0161192	0.00863376	-0.83108	-0.768658	0.994872	1.02867	0.10056	0.99321	98
77	-0.852601	0.994294	0.0280505	0.016696	-0.914172	-0.805516	0.95711	1.02164	0.206901	0.98346	103
78	-0.85666	0.991679	0.0132712	0.0075718	-0.882243	-0.831559	0.977544	1.0069	0.0915899	0.993511	95
79	-0.93271	0.998484	0.02237	0.0149366	-0.975406	-0.887915	0.971343	1.02994	0.331057	0.975257	99
80	-1.04598	1.00433	0.0309739	0.0161895	-1.10699	-0.98671	0.972508	1.03623	0.402644	0.960463	98
81	-0.94497	1.00487	0.0192247	0.0105278	-0.984246	-0.90805	0.983693	1.02479	0.167478	0.985273	102
82	-0.816064	1.06241	0.0472831	0.0252414	-0.896029	-0.715273	1.01886	1.11567	0.409974	0.970092	97
83	-0.935106	1.00683	0.025694	0.0158123	-0.985617	-0.884696	0.975211	1.03769	0.587546	0.973263	96
84	-0.902557	0.997217	0.0180407	0.00867401	-0.942016	-0.871199	0.978039	1.01229	0.0776106	0.994934	99
85	-0.821834	1.02674	0.0331726	0.0263141	-0.885415	-0.754281	0.978135	1.07965	0.27528	0.973595	99
86	-0.774995	1.09497	0.0595584	0.034158	-0.884008	-0.653975	1.03202	1.1649	0.865328	0.938041	93
87	-0.872547	0.99184	0.0534035	0.0202042	-0.975557	-0.767652	0.952486	1.03174	0.229988	0.95314	102
88	-0.815011	1.0249	0.0248323	0.0178404	-0.858051	-0.762709	0.996252	1.06591	0.776167	0.949105	92
89	-0.783229	1.03736	0.0540234	0.0225581	-0.888517	-0.679414	0.993742	1.08128	0.364836	0.950721	106
90	-1.06157	1.0094	0.0240917	0.0147328	-1.10562	-1.01257	0.982408	1.03953	0.266837	0.97966	104
91	-0.95921	1.0221	0.0207866	0.014907	-0.99737	-0.915903	0.994278	1.05294	0.177612	0.980108	96
92	-0.755466	1.15478	0.0100465	0.0264801	-0.776091	-0.736907	1.10968	1.2132	0.796521	0.936487	95
93	-0.877503	0.976376	0.0111084	0.0184259	-0.899176	-0.855252	0.94229	1.01424	0.298651	0.975185	98
94	-0.987517	0.986962	0.0375468	0.0166622	-1.06458	-0.916556	0.952811	1.0184	0.349479	0.972525	100
95	-0.964748	0.9577	0.0191411	0.0195227	-1.00206	-0.927422	0.919122	0.99477	0.336536	0.958854	101
96	-0.851451	1.04788	0.0679101	0.0294092	-0.977669	-0.71475	0.994499	1.10835	0.87773	0.934054	99
97	-0.958966	1.0198	0.0262295	0.0197848	-1.00794	-0.905063	0.983343	1.06076	0.273004	0.984471	97
98	-0.840157	1.00451	0.0313524	0.0188981	-0.904639	-0.78117	0.964861	1.03961	0.72216	0.946026	102
99	-0.892626	1.04423	0.0293946	0.0193595	-0.944556	-0.828008	1.01058	1.08696	0.317158	0.969923	98
100	-0.890139	1.0706	0.0571816	0.0239097	-0.9961	-0.77264	1.02611	1.12006	0.547992	0.956254	100
101	-0.735504	1.02293	0.0497408	0.022522	-0.814731	-0.620945	0.987237	1.07438	0.249039	0.971831	95
a represents the estimate of the intercept;
b represents the estimate of the slope (i.e., the estimate of the scaling exponent of leaf dry mass vs. fresh mass);
"sd.a" represents the standard error of the intercept;
"sd.b" represents the standard error of the slope;
"lci.a" and "uci.a" represent the lower and upper bounds of the 95% confidence interval of the intercept, respectively;
"lci.b" and "uci.b" represent the lower and upper bounds of the 95% confidence interval of the slope, respectively;
RSS represents the residual sum of squares;
R2 represents the coefficient of determination, which is an indicator of the goodness of fit;
n represents the sample size, namely the number of the sampled leaves.

## Sheet: Table S4
Table S4. Fitted results for the scaling relationships between the leaf dry mass and leaf surface area of the 101 bamboo taxa.
Dataset Code	a	b	sd.a	sd.b	lci.a	uci.a	lci.b	uci.b	RSS	R2	n
1	-6.22613	1.10118	0.0741602	0.0253387	-6.3784	-6.09381	1.05557	1.15363	0.587669	0.943001	99
2	-6.04388	1.13296	0.0794219	0.0333155	-6.21061	-5.89665	1.06995	1.2015	2.38769	0.886068	90
3	-5.8856	1.09044	0.0655666	0.0252056	-6.01144	-5.7588	1.04175	1.13987	1.73676	0.907196	100
4	-5.88254	1.12067	0.0724116	0.0300689	-6.02571	-5.74285	1.06261	1.17994	1.24942	0.929115	97
5	-5.3362	1.03562	0.0622689	0.026342	-5.45405	-5.21285	0.983108	1.08569	0.513468	0.950673	93
6	-5.56018	1.06171	0.0913038	0.0362273	-5.74887	-5.39018	0.994782	1.13805	1.05253	0.908661	97
7	-5.54596	1.10681	0.0994702	0.0296536	-5.72935	-5.34276	1.04648	1.16148	0.534475	0.9604	98
8	-5.92404	1.12048	0.0279635	0.0127459	-5.98183	-5.87061	1.09573	1.14728	0.292976	0.984645	100
9	-5.52829	1.01385	0.0547788	0.0253604	-5.64184	-5.42657	0.96622	1.06557	0.888689	0.933235	95
10	-5.98762	1.11146	0.0708724	0.0300489	-6.13299	-5.85714	1.05649	1.17255	0.687841	0.949264	99
11	-5.87383	1.02994	0.0536849	0.0237416	-5.97404	-5.76296	0.981699	1.07366	0.698318	0.93856	100
12	-6.02144	1.12258	0.0746966	0.0227945	-6.18749	-5.89488	1.08323	1.17295	0.591686	0.965655	98
13	-5.73088	1.01312	0.0537146	0.0179775	-5.84773	-5.63217	0.979602	1.05109	0.794451	0.95595	97
14	-5.65676	1.02626	0.0575326	0.0197477	-5.77929	-5.55151	0.989363	1.06785	0.755002	0.963029	98
15	-5.49789	1.01975	0.0639988	0.0186205	-5.62165	-5.3682	0.982118	1.05589	0.96074	0.949121	100
16	-6.01076	1.07123	0.0593414	0.0249791	-6.12769	-5.89336	1.02193	1.11939	0.705359	0.933678	97
17	-5.42271	1.05041	0.0611648	0.0184417	-5.54015	-5.29678	1.01259	1.08546	0.587119	0.959416	104
18	-6.71544	1.23831	0.260961	0.0574292	-7.26025	-6.24023	1.1342	1.35843	3.43156	0.802112	98
19	-6.14371	1.13335	0.20703	0.0448959	-6.57315	-5.76691	1.05027	1.22491	2.07514	0.841616	91
20	-6.05586	1.15189	0.232253	0.0501846	-6.52994	-5.62983	1.05972	1.25582	2.55548	0.856805	101
21	-6.28674	1.05681	0.0340165	0.0250747	-6.35288	-6.21852	1.00762	1.10683	0.691911	0.928133	106
22	-6.05095	1.29842	0.0682586	0.0485151	-6.18872	-5.92331	1.20875	1.3968	0.765318	0.914854	99
23	-6.06664	1.06277	0.0438934	0.0170994	-6.15228	-5.97882	1.02818	1.09573	0.712955	0.976667	103
24	-5.66013	1.02689	0.0936068	0.03836	-5.85154	-5.48508	0.953812	1.1044	0.624698	0.831906	101
25	-5.83507	1.12085	0.0708394	0.0551609	-5.98084	-5.71174	1.02372	1.23804	1.87479	0.798017	101
26	-5.47343	1.06068	0.108434	0.0413827	-5.68684	-5.26566	0.98143	1.14315	1.28605	0.811611	99
27	-5.71163	1.15066	0.0917123	0.0279075	-5.89764	-5.54114	1.09872	1.20815	0.538498	0.933992	100
28	-6.06831	1.21208	0.103338	0.0262566	-6.26953	-5.86543	1.16046	1.2627	1.16231	0.94723	96
29	-5.77538	1.1188	0.0732513	0.0169663	-5.92837	-5.64437	1.08845	1.15462	0.51496	0.982722	100
30	-5.67632	1.08826	0.088246	0.0202217	-5.85295	-5.50892	1.04938	1.12848	0.786077	0.968999	95
31	-5.77604	1.16373	0.0914413	0.0322436	-5.96127	-5.60948	1.10407	1.22976	0.606068	0.940805	102
32	-6.62436	1.29429	0.27087	0.0854501	-7.21013	-6.15314	1.14359	1.47742	1.52996	0.746768	98
33	-5.62782	1.11052	0.0608781	0.0186936	-5.74785	-5.50646	1.07393	1.14697	0.565777	0.975652	100
34	-5.27789	1.04137	0.0714682	0.0260193	-5.42037	-5.13292	0.988857	1.09315	0.699159	0.930167	100
35	-5.68133	1.06504	0.0654234	0.0224726	-5.81656	-5.55561	1.02152	1.11088	0.540642	0.96876	100
36	-5.93207	1.11049	0.0876199	0.0351284	-6.09847	-5.76146	1.04313	1.17849	1.07475	0.883754	96
37	-5.82131	1.06691	0.0558914	0.0246018	-5.94067	-5.71557	1.02095	1.11916	0.803986	0.919814	107
38	-6.0014	1.15974	0.0221739	0.0191314	-6.04235	-5.95603	1.12209	1.1972	0.610475	0.965012	99
39	-5.58006	1.17582	0.0444345	0.0241751	-5.67023	-5.50004	1.13185	1.22469	0.258051	0.973255	100
40	-5.49929	1.14973	0.0440811	0.025039	-5.58728	-5.41808	1.10331	1.19942	0.267901	0.961356	94
41	-5.87484	1.19073	0.155219	0.0551456	-6.22953	-5.63091	1.10442	1.31678	3.74838	0.739383	102
42	-5.46821	1.10914	0.057795	0.0271356	-5.58418	-5.35825	1.05812	1.16401	0.290358	0.974849	103
43	-5.67238	1.10786	0.113649	0.0451588	-5.90432	-5.45188	1.01836	1.19974	1.5704	0.852232	100
44	-5.80206	1.16648	0.0956817	0.0365594	-5.99423	-5.61324	1.09637	1.24166	1.0092	0.890944	100
45	-5.41019	1.09376	0.0768192	0.0331389	-5.56939	-5.26956	1.03325	1.16323	1.2583	0.892358	99
46	-5.33691	1.0702	0.0468074	0.0176064	-5.43299	-5.24988	1.03766	1.10606	0.253223	0.96401	98
47	-5.11385	1.07842	0.0503955	0.0218657	-5.22247	-5.02429	1.03904	1.12469	0.577155	0.944416	106
48	-5.30614	1.00615	0.0657625	0.0244789	-5.44331	-5.18699	0.962532	1.05745	1.35727	0.922585	100
49	-5.56217	1.09797	0.0425633	0.0185947	-5.64632	-5.4788	1.06143	1.1338	1.02436	0.963263	101
50	-5.67579	1.09832	0.0412436	0.0149063	-5.7591	-5.59296	1.06854	1.12832	0.379248	0.978574	105
51	-6.24386	1.20212	0.0866591	0.0421121	-6.41343	-6.08044	1.1214	1.28553	1.50814	0.869453	101
52	-5.9464	1.02102	0.0949133	0.0389551	-6.15191	-5.77219	0.948918	1.10604	1.19131	0.808555	98
53	-5.47743	1.05483	0.0465528	0.0310406	-5.57247	-5.39013	0.996581	1.11783	0.550972	0.925162	110
54	-5.82371	1.22251	0.0696476	0.0401398	-5.97007	-5.68799	1.14124	1.30342	1.46289	0.872349	101
55	-5.62764	1.14813	0.0886994	0.03641	-5.8045	-5.45258	1.07659	1.22082	1.61439	0.876599	104
56	-5.76842	1.12214	0.0547935	0.0198077	-5.87378	-5.6607	1.08292	1.15973	0.397788	0.979945	98
57	-5.39414	1.10562	0.0529519	0.0243422	-5.49345	-5.29008	1.05747	1.15196	0.333538	0.953322	97
58	-5.59733	1.13882	0.072741	0.0321493	-5.74906	-5.46481	1.07947	1.2072	0.72619	0.886515	96
59	-5.37042	1.08276	0.045571	0.0204125	-5.46633	-5.29184	1.04719	1.12523	0.196774	0.979639	100
60	-5.51987	1.09261	0.0544796	0.0224568	-5.62093	-5.41039	1.04768	1.13474	0.370852	0.953769	104
61	-5.56811	1.18931	0.0526588	0.0243576	-5.66959	-5.46837	1.14393	1.23645	0.410621	0.957235	98
62	-5.72815	1.10435	0.0795459	0.0289812	-5.88382	-5.57073	1.04791	1.16217	0.336236	0.950264	97
63	-5.84348	1.15084	0.0757545	0.042009	-5.9996	-5.69902	1.07121	1.2375	0.797187	0.85774	104
64	-5.95669	1.23302	0.07831	0.0324749	-6.14224	-5.82616	1.1771	1.30751	1.02162	0.900234	100
65	-5.67023	1.13787	0.0551657	0.026319	-5.78426	-5.56668	1.08861	1.19237	0.580513	0.93341	106
66	-5.47054	1.09461	0.102453	0.0377093	-5.68301	-5.27675	1.02306	1.17298	1.67859	0.859105	101
67	-5.81464	1.14546	0.0691965	0.0243771	-5.96469	-5.69276	1.10271	1.19798	0.556268	0.942662	99
68	-5.692	1.12668	0.0657348	0.0298545	-5.82467	-5.56768	1.07064	1.1866	0.77286	0.950777	102
69	-5.42054	1.03537	0.0674279	0.0292266	-5.55769	-5.29057	0.98031	1.09507	1.28834	0.903134	100
70	-5.3566	1.13182	0.0532223	0.0212238	-5.4614	-5.25391	1.09053	1.17234	0.527852	0.960868	98
71	-5.70562	1.2209	0.0723471	0.0345046	-5.84974	-5.56947	1.15602	1.28922	0.759816	0.963319	103
72	-5.6778	1.10158	0.0538384	0.0212329	-5.78792	-5.57869	1.06261	1.14468	0.373318	0.962555	95
73	-5.68935	1.10337	0.0598193	0.019389	-5.80363	-5.57303	1.06481	1.14052	0.417851	0.954766	92
74	-5.60849	1.15283	0.0440281	0.0220044	-5.703	-5.53109	1.11315	1.19919	0.46931	0.977056	104
75	-5.5864	1.12829	0.0568549	0.0220631	-5.70527	-5.48472	1.08875	1.17466	0.610158	0.95761	111
76	-5.34726	1.10254	0.0427322	0.0171239	-5.43454	-5.2655	1.06963	1.138	0.262748	0.982258	98
77	-5.38784	1.05938	0.104749	0.0387653	-5.55835	-5.15745	0.974481	1.12348	0.676292	0.945936	103
78	-5.27033	1.0483	0.064738	0.0253673	-5.40614	-5.15466	1.00071	1.10108	0.920254	0.934797	95
79	-5.48988	1.04639	0.0666782	0.0221464	-5.62622	-5.36985	1.00538	1.09144	0.642888	0.951951	99
80	-6.24935	1.16165	0.0761476	0.0262605	-6.40303	-6.1083	1.11242	1.21496	0.492839	0.951607	98
81	-5.90974	1.11376	0.0521545	0.0180234	-6.02169	-5.81442	1.07994	1.15218	0.38731	0.965943	102
82	-5.90864	1.19286	0.105365	0.0396017	-6.1339	-5.7227	1.12343	1.27958	1.05087	0.923339	97
83	-5.53069	1.06998	0.0590459	0.0207031	-5.64651	-5.41251	1.02874	1.11022	0.924147	0.957945	96
84	-5.1826	1.11006	0.0370569	0.0176692	-5.25002	-5.10499	1.0734	1.14199	0.263367	0.982809	99
85	-5.86067	1.17242	0.103622	0.0326093	-6.06462	-5.65755	1.10789	1.23689	0.483909	0.953583	99
86	-6.17187	1.22305	0.135047	0.0457289	-6.4595	-5.93007	1.13908	1.31962	1.71215	0.877407	93
87	-5.49494	1.00207	0.0464142	0.0234114	-5.58892	-5.40782	0.958201	1.04915	0.601437	0.877458	102
88	-5.49962	1.10518	0.1002	0.0324616	-5.7315	-5.33654	1.05179	1.17875	1.42597	0.906496	92
89	-5.47484	1.0485	0.0583173	0.0269732	-5.59487	-5.36614	0.998529	1.10391	0.437778	0.940868	106
90	-6.32387	1.16287	0.0731484	0.0230551	-6.47284	-6.18746	1.1195	1.20956	0.446962	0.96593	104
91	-6.12836	1.16518	0.0968025	0.0299542	-6.33577	-5.95856	1.11195	1.22889	0.544799	0.938983	96
92	-6.24926	1.31462	0.218484	0.0507578	-6.73098	-5.87699	1.2264	1.42555	2.09371	0.833053	95
93	-5.44713	1.14419	0.116202	0.0328406	-5.71383	-5.2608	1.09059	1.21907	0.505117	0.95803	98
94	-5.43726	1.07042	0.0703644	0.0323486	-5.56496	-5.29557	1.00484	1.12952	0.859948	0.932393	100
95	-5.66595	1.0669	0.0752905	0.0209624	-5.8102	-5.51727	1.0255	1.10615	0.342101	0.958174	101
96	-6.04189	1.14308	0.105445	0.0419174	-6.25588	-5.84417	1.06466	1.22817	1.57647	0.881555	99
97	-5.58447	1.10107	0.0469438	0.016133	-5.6831	-5.50051	1.07152	1.13507	0.352216	0.979965	97
98	-5.4386	1.04165	0.0776927	0.0268894	-5.58203	-5.26799	0.984842	1.09164	1.40159	0.895246	102
99	-6.22476	1.18711	0.132592	0.04172	-6.51115	-6.00576	1.11701	1.2775	0.882381	0.916321	98
100	-5.77971	1.17301	0.0730306	0.0350288	-5.9332	-5.64946	1.10792	1.24524	0.983672	0.921474	100
101	-5.68079	1.15743	0.0753049	0.0323035	-5.83473	-5.5458	1.09916	1.2237	0.392703	0.955581	95
a represents the estimate of the intercept;
b represents the estimate of the slope (i.e., the estimate of the scaling exponent of leaf dry mass vs. leaf area);
"sd.a" represents the standard error of the intercept;
"sd.b" represents the standard error of the slope;
"lci.a" and "uci.a" represent the lower and upper bounds of the 95% confidence interval of the intercept, respectively;
"lci.b" and "uci.b" represent the lower and upper bounds of the 95% confidence interval of the slope, respectively;
RSS represents the residual sum of squares;
R2 represents the coefficient of determination, which is an indicator of the goodness of fit;
n represents the sample size, namely the number of the sampled leaves.

## Sheet: Table S5
Table S5. Fitted results for the scaling relationships between the leaf fresh mass and leaf surface area of the 101 bamboo taxa.
Dataset Code	a	b	sd.a	sd.b	lci.a	uci.a	lci.b	uci.b	RSS	r2	n
1	-5.21723	1.07718	0.0526478	0.0181578	-5.32882	-5.12056	1.04388	1.11575	0.302913	0.969296	99
2	-5.02653	1.11346	0.0540552	0.0223314	-5.13638	-4.92793	1.07239	1.15949	0.827917	0.959099	90
3	-4.94734	1.08767	0.0504763	0.0191755	-5.04545	-4.84474	1.04842	1.12573	0.844449	0.954647	100
4	-4.92822	1.10856	0.0500161	0.0202847	-5.02516	-4.83016	1.06964	1.1487	0.755384	0.956202	97
5	-4.69798	1.10406	0.0449888	0.0194912	-4.78549	-4.60733	1.06516	1.14181	0.328704	0.972216	93
6	-4.7842	1.07168	0.0640257	0.0253712	-4.92099	-4.66506	1.02441	1.12445	0.61111	0.94795	97
7	-4.51266	1.04855	0.0423185	0.0125089	-4.59432	-4.42715	1.0232	1.07253	0.135177	0.988841	98
8	-4.99511	1.09934	0.0273913	0.0121666	-5.05271	-4.94345	1.07607	1.12384	0.255706	0.986078	100
9	-4.90482	1.12368	0.0293768	0.013468	-4.96359	-4.84944	1.09788	1.15057	0.301783	0.981543	95
10	-4.8831	1.04435	0.0368809	0.01595	-4.94915	-4.80458	1.01079	1.07302	0.198452	0.98342	99
11	-4.77694	0.992473	0.0465555	0.020056	-4.86173	-4.68079	0.950318	1.029	0.396014	0.962477	100
12	-4.88681	1.08559	0.0549727	0.0167147	-5.0106	-4.79515	1.05686	1.12235	0.315874	0.980394	98
13	-4.90818	1.07323	0.0419855	0.0139663	-4.99196	-4.82817	1.04585	1.10103	0.359508	0.982236	97
14	-4.73677	1.06665	0.0479594	0.0169437	-4.82719	-4.64293	1.03348	1.09924	0.545449	0.975275	98
15	-4.6902	1.04112	0.0358947	0.0105089	-4.76516	-4.62218	1.02143	1.06255	0.276789	0.985937	100
16	-4.89941	1.02437	0.0309625	0.0134112	-4.96021	-4.84189	0.999186	1.0503	0.202326	0.979196	97
17	-4.69347	1.0836	0.0248279	0.00767394	-4.74341	-4.64701	1.06886	1.09896	0.100006	0.993504	104
18	-5.67198	1.21035	0.156627	0.0339786	-5.99859	-5.38266	1.14782	1.28175	1.06918	0.935463	98
19	-4.98674	1.0889	0.178409	0.0387682	-5.35621	-4.65945	1.01847	1.16856	1.4711	0.878364	91
20	-4.99688	1.11467	0.168865	0.0367336	-5.33842	-4.68577	1.04641	1.18974	1.60016	0.904248	101
21	-5.36657	1.09184	0.0232378	0.0176609	-5.40957	-5.31947	1.05738	1.12646	0.353086	0.965641	106
22	-5.23464	1.27685	0.0411783	0.0292059	-5.31919	-5.15727	1.22125	1.33695	0.474574	0.945401	99
23	-4.96127	1.03127	0.0437608	0.0170873	-5.04607	-4.87129	0.995877	1.06338	0.528503	0.981631	103
24	-4.9178	1.06604	0.0798821	0.0323511	-5.07881	-4.76389	1.00348	1.1322	0.373352	0.906782	101
25	-4.92847	1.05963	0.0343366	0.0293267	-4.99712	-4.86423	1.00452	1.11943	0.710064	0.914405	101
26	-4.70021	1.07358	0.0626212	0.0245861	-4.81808	-4.57674	1.02559	1.12023	0.489422	0.930019	99
27	-4.55968	1.0661	0.0777974	0.0232438	-4.71247	-4.40871	1.021	1.11176	0.390313	0.944265	100
28	-4.81998	1.10528	0.0421241	0.0110969	-4.90265	-4.73847	1.08344	1.12693	0.252444	0.986217	96
29	-4.78508	1.08756	0.04734	0.0109381	-4.87946	-4.69595	1.06688	1.10921	0.17273	0.993867	100
30	-4.87111	1.09062	0.0523742	0.0119847	-4.98381	-4.77889	1.06904	1.11657	0.354647	0.986074	95
31	-4.8929	1.14313	0.0314132	0.0108634	-4.95566	-4.83244	1.12229	1.16492	0.115291	0.98833	102
32	-5.14191	1.13409	0.127597	0.0403773	-5.42294	-4.91765	1.0632	1.22241	0.408141	0.912012	98
33	-4.77522	1.09756	0.0382951	0.0117648	-4.85149	-4.69947	1.07413	1.12063	0.250813	0.98895	100
34	-4.40579	1.03228	0.0467216	0.016597	-4.49978	-4.31818	1.00084	1.06565	0.258299	0.973744	100
35	-4.7178	1.05213	0.036816	0.0123063	-4.79597	-4.65302	1.02959	1.0778	0.1345	0.992036	100
36	-5.13924	1.16136	0.0706796	0.0279142	-5.274	-4.99498	1.10452	1.21391	0.701143	0.930661	96
37	-4.74095	1.03876	0.0331633	0.0151241	-4.80874	-4.67781	1.01009	1.07035	0.216241	0.977248	107
38	-5.08179	1.1402	0.0207093	0.016173	-5.1218	-5.04021	1.10766	1.17154	0.365766	0.978312	99
39	-4.79906	1.16949	0.0308663	0.0160249	-4.85942	-4.73865	1.13828	1.20158	0.165626	0.982648	100
40	-4.68404	1.13357	0.0363311	0.0205522	-4.75625	-4.6139	1.09415	1.17488	0.186629	0.972306	94
41	-4.73567	1.09632	0.0501398	0.0177753	-4.83838	-4.64035	1.06337	1.13223	0.358926	0.970561	102
42	-4.56296	1.08191	0.0232651	0.0110259	-4.61161	-4.52096	1.06205	1.10485	0.0979903	0.991079	103
43	-4.80826	1.10931	0.0666725	0.0268748	-4.95086	-4.68953	1.06041	1.16574	0.569277	0.946573	100
44	-5.05058	1.19236	0.0698056	0.0266382	-5.18459	-4.9129	1.13865	1.24382	0.517533	0.946476	100
45	-4.71814	1.13558	0.0541773	0.0235558	-4.82898	-4.61494	1.09069	1.18325	0.696944	0.94469	99
46	-4.61351	1.10297	0.0476631	0.0174075	-4.70593	-4.5222	1.0692	1.13684	0.162702	0.978229	98
47	-4.4408	1.09666	0.0218902	0.00961899	-4.48438	-4.3971	1.07728	1.11556	0.100514	0.990639	106
48	-4.53889	1.04635	0.0522846	0.0191074	-4.64809	-4.44532	1.01139	1.08625	0.648658	0.965791	100
49	-4.62745	1.07866	0.0239957	0.0108617	-4.67667	-4.58291	1.05883	1.1001	0.326116	0.987882	101
50	-4.65254	1.09304	0.033087	0.0123238	-4.71987	-4.58704	1.06849	1.11791	0.292467	0.983317	105
51	-5.27353	1.19786	0.053979	0.0256927	-5.38285	-5.16606	1.1467	1.25022	0.486163	0.957617	101
52	-5.08744	1.07098	0.0495441	0.0205184	-5.18494	-4.99349	1.03174	1.11136	0.240982	0.964803	98
53	-4.70353	1.11265	0.0399575	0.0262804	-4.78474	-4.62905	1.06408	1.16652	0.32438	0.9604	110
54	-4.90681	1.17438	0.0491675	0.0296417	-5.00203	-4.80581	1.11215	1.22879	0.66394	0.937219	101
55	-4.74673	1.14341	0.0563409	0.0230307	-4.85283	-4.63314	1.09767	1.18577	0.595432	0.95411	104
56	-4.96647	1.14161	0.0439306	0.0159342	-5.05476	-4.88349	1.11064	1.17332	0.243543	0.988137	98
57	-4.55917	1.10982	0.0351578	0.0162755	-4.62293	-4.48524	1.07608	1.13943	0.151163	0.979005	97
58	-4.68432	1.118	0.0406131	0.0177622	-4.76952	-4.61271	1.08619	1.15497	0.191968	0.968873	96
59	-4.54092	1.07801	0.0294579	0.0132845	-4.60183	-4.48685	1.05347	1.10561	0.0826195	0.991376	100
60	-4.72967	1.10192	0.0330831	0.0133279	-4.79589	-4.66778	1.07617	1.12854	0.128014	0.98431	104
61	-4.77621	1.19964	0.0413622	0.0186903	-4.86355	-4.70127	1.16523	1.23863	0.229062	0.976553	98
62	-4.76785	1.08789	0.0400512	0.0147618	-4.84445	-4.68407	1.05788	1.11668	0.141008	0.978506	97
63	-4.84463	1.17314	0.0418726	0.0224206	-4.92847	-4.76346	1.13038	1.21819	0.248758	0.95728	104
64	-5.09705	1.20902	0.054275	0.0225985	-5.21266	-5.00191	1.1688	1.25697	0.448143	0.954482	100
65	-4.6293	1.07578	0.0319067	0.0148796	-4.69382	-4.5718	1.04899	1.10634	0.209815	0.973074	106
66	-4.62849	1.08054	0.0604337	0.0218611	-4.75571	-4.51621	1.04065	1.12603	0.534122	0.953992	101
67	-5.11288	1.20121	0.0672033	0.0232251	-5.25636	-4.992	1.1595	1.25065	0.358912	0.966359	99
68	-4.77615	1.13317	0.0284656	0.0125567	-4.8296	-4.7191	1.10848	1.1569	0.18458	0.988378	102
69	-4.51159	1.04345	0.0456199	0.0198962	-4.59709	-4.41927	1.00296	1.08169	0.493719	0.963452	100
70	-4.6667	1.18188	0.044266	0.0171417	-4.75784	-4.58547	1.15023	1.2173	0.18804	0.987216	98
71	-4.66202	1.1593	0.0267492	0.0126494	-4.71327	-4.61039	1.13419	1.18283	0.366509	0.980376	103
72	-4.80113	1.10542	0.0335228	0.0130423	-4.86954	-4.73744	1.08074	1.13191	0.151056	0.984954	95
73	-4.8238	1.11129	0.0365799	0.0113144	-4.90108	-4.75727	1.09058	1.13503	0.138227	0.985249	92
74	-4.66505	1.12775	0.0244575	0.0121376	-4.71344	-4.61746	1.10369	1.15121	0.238702	0.987805	104
75	-4.74764	1.14559	0.028009	0.010347	-4.80505	-4.69591	1.12603	1.16665	0.118593	0.992008	111
76	-4.49253	1.08861	0.0345084	0.0134508	-4.56482	-4.42922	1.064	1.1169	0.121482	0.991586	98
77	-4.56126	1.06546	0.069189	0.0259473	-4.67596	-4.40734	1.0083	1.10842	0.371048	0.970675	103
78	-4.45071	1.0571	0.0510008	0.0199719	-4.56245	-4.35883	1.02042	1.10073	0.562112	0.960833	95
79	-4.56409	1.04798	0.0474349	0.0151174	-4.65563	-4.47269	1.01888	1.07703	0.227189	0.983071	99
80	-5.18092	1.15663	0.048963	0.0168264	-5.27968	-5.085	1.12321	1.19025	0.252642	0.974977	98
81	-4.94071	1.10836	0.040322	0.0136626	-5.02441	-4.86623	1.08313	1.13619	0.166491	0.985217	102
82	-4.79343	1.12279	0.0544273	0.0206925	-4.90922	-4.69271	1.08499	1.16713	0.448997	0.96303	97
83	-4.56439	1.06272	0.0239249	0.00878946	-4.61079	-4.51952	1.04571	1.07925	0.210797	0.990276	96
84	-4.29198	1.11316	0.0277247	0.0131951	-4.34686	-4.23911	1.08809	1.13924	0.172552	0.988799	99
85	-4.90759	1.14188	0.0501965	0.0160587	-5.00994	-4.81701	1.11238	1.1746	0.134741	0.986375	99
86	-4.92878	1.11697	0.0642285	0.0215202	-5.05927	-4.80594	1.07453	1.16039	0.470261	0.959629	93
87	-4.66042	1.01032	0.0481518	0.0240772	-4.75869	-4.57022	0.964899	1.05866	0.443395	0.911127	102
88	-4.57078	1.07832	0.065956	0.0213197	-4.72032	-4.45543	1.04052	1.12501	0.556926	0.96164	92
89	-4.52263	1.01073	0.039876	0.0180057	-4.60259	-4.44693	0.977077	1.04716	0.19614	0.97149	106
90	-5.21329	1.15204	0.0400061	0.0124827	-5.29393	-5.13898	1.1287	1.17736	0.144055	0.988812	104
91	-5.05737	1.13998	0.0819363	0.0255376	-5.23289	-4.90976	1.09333	1.19395	0.362002	0.957644	96
92	-4.75744	1.13841	0.117794	0.0279303	-4.99076	-4.53917	1.08686	1.19315	0.496833	0.947171	95
93	-4.68019	1.17188	0.0840236	0.0236778	-4.87472	-4.54737	1.13524	1.22613	0.228729	0.981882	98
94	-4.50853	1.08456	0.0625721	0.0288451	-4.62777	-4.38668	1.0276	1.14035	0.687502	0.947351	100
95	-4.90884	1.11403	0.0501545	0.0140906	-5.01011	-4.81541	1.08758	1.14245	0.175087	0.980366	101
96	-4.95326	1.09085	0.0369132	0.0138218	-5.03	-4.88398	1.06487	1.11902	0.229785	0.981043	99
97	-4.53569	1.0797	0.0516403	0.0172861	-4.63653	-4.43499	1.0461	1.11398	0.259218	0.984665	97
98	-4.57778	1.03697	0.0422296	0.0153069	-4.65606	-4.48956	1.00534	1.06553	0.346912	0.973837	102
99	-5.10626	1.13683	0.0840453	0.0261681	-5.28932	-4.95564	1.08993	1.19372	0.390336	0.959636	98
100	-4.56712	1.09565	0.0370112	0.0171476	-4.64232	-4.49865	1.0636	1.13039	0.201429	0.981569	100
101	-4.83445	1.13148	0.0428013	0.0185613	-4.92186	-4.75158	1.09493	1.16907	0.174528	0.979343	95
a represents the estimate of the intercept;
b represents the estimate of the slope (i.e., the estimate of the scaling exponent of leaf fresh mass to leaf area);
"sd.a" represents the standard error of the intercept;
"sd.b" represents the standard error of the slope;
"lci.a" and "uci.a" represent the lower and upper bounds of the 95% confidence interval of the intercept, respectively;
"lci.b" and "uci.b" represent the lower and upper bounds of the 95% confidence interval of the slope, respectively;
RSS represents the residual sum of squares;
R2 represents the coefficient of determination, which is an indicator of the goodness of fit;
n represents the sample size, namely the number of the sampled leaves.
